# Supplementary material
Source: Springer Nature journal article supplement (https://www.springermedizin.de/resource/supplementary/13049_2013_754_MOESM1_ESM.pdf/9667224)

%

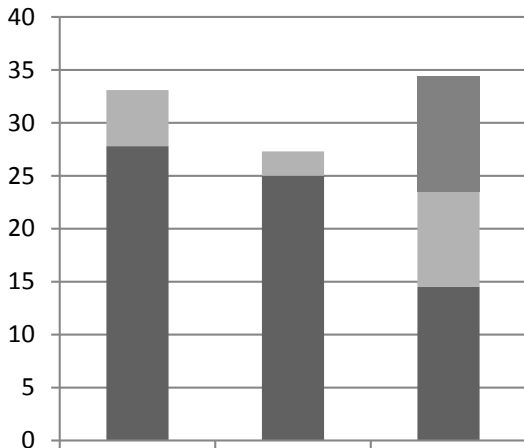

2009

2010

2011

Year

■ Manuscript in preparation

■ Under review

■ Published

Supplement: MOESM1 [file 9667224]
